# Supplementary material
Source: PubMed Central journal article supplement (PMC4118928)
Supplement: NIHMS607412-supplement-supplement_1.pdf [file NIHMS607412-supplement-supplement_1.pdf]

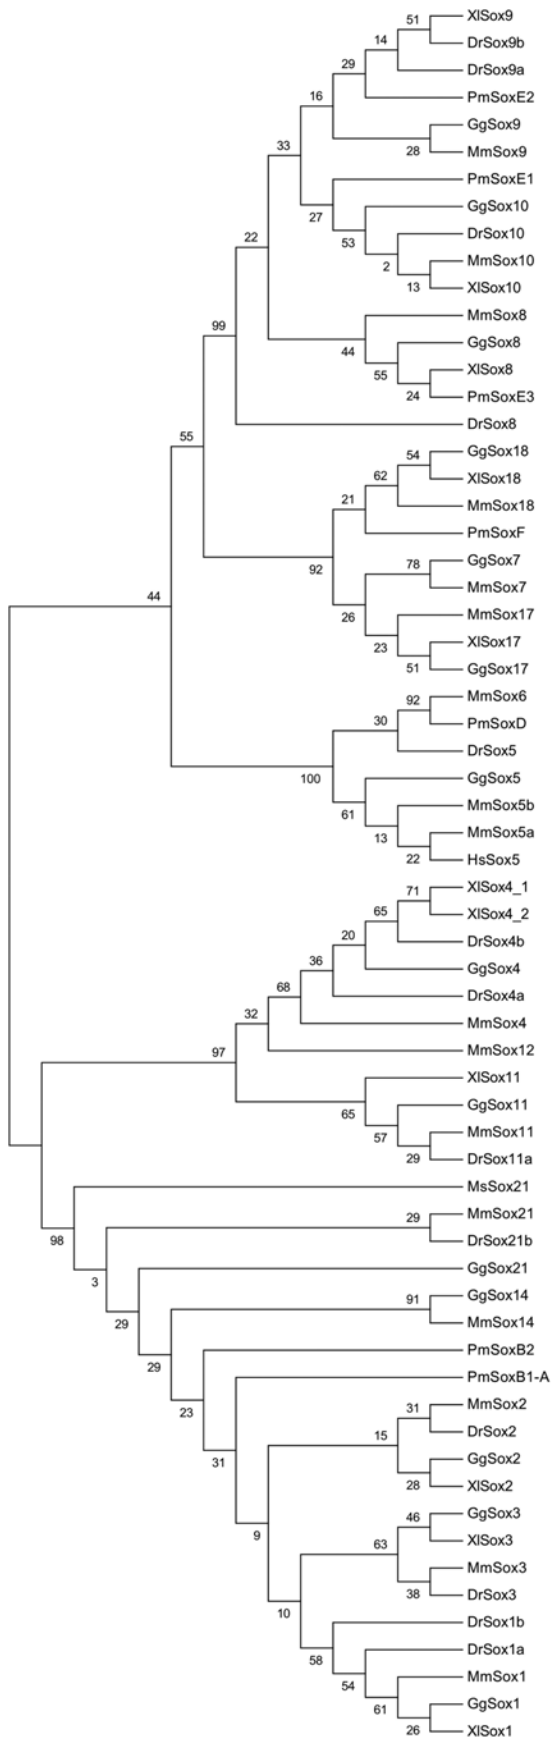

**Figure S1: Maximum Likelihood phylogenetic tree of lamprey Sox genes:** Unrooted phylogenetic tree of Sox genes obtained from analysis performed on MEGA 5.05. The HMG box protein sequences were used in the construction of the tree. Boxes highlight the families of Sox genes. Abbreviations are *Dr*, *Danio rerio*; *Gg*, *Gallus gallus*; *Mm*, *Mus musculus*; *Pm*, *Petromyzon marinus*; *Xl*, *Xenopus laevis*.

---
